# Supplementary material for: APOE ε2-Carriers Are Associated with an Increased Risk of Primary Angle-Closure Glaucoma in Patients of Saudi Origin
Source: MDPI journal article supplement (doi:10.3390/ijms25084571), 2024-04-22
Supplement: s1 [file s1]

**Figure S1:** Association analysis of IOP and cup/disc ratio with rs429358 and rs7412 genotypes in primary angle-closure glaucoma patients in dominant model. \* Outlier.

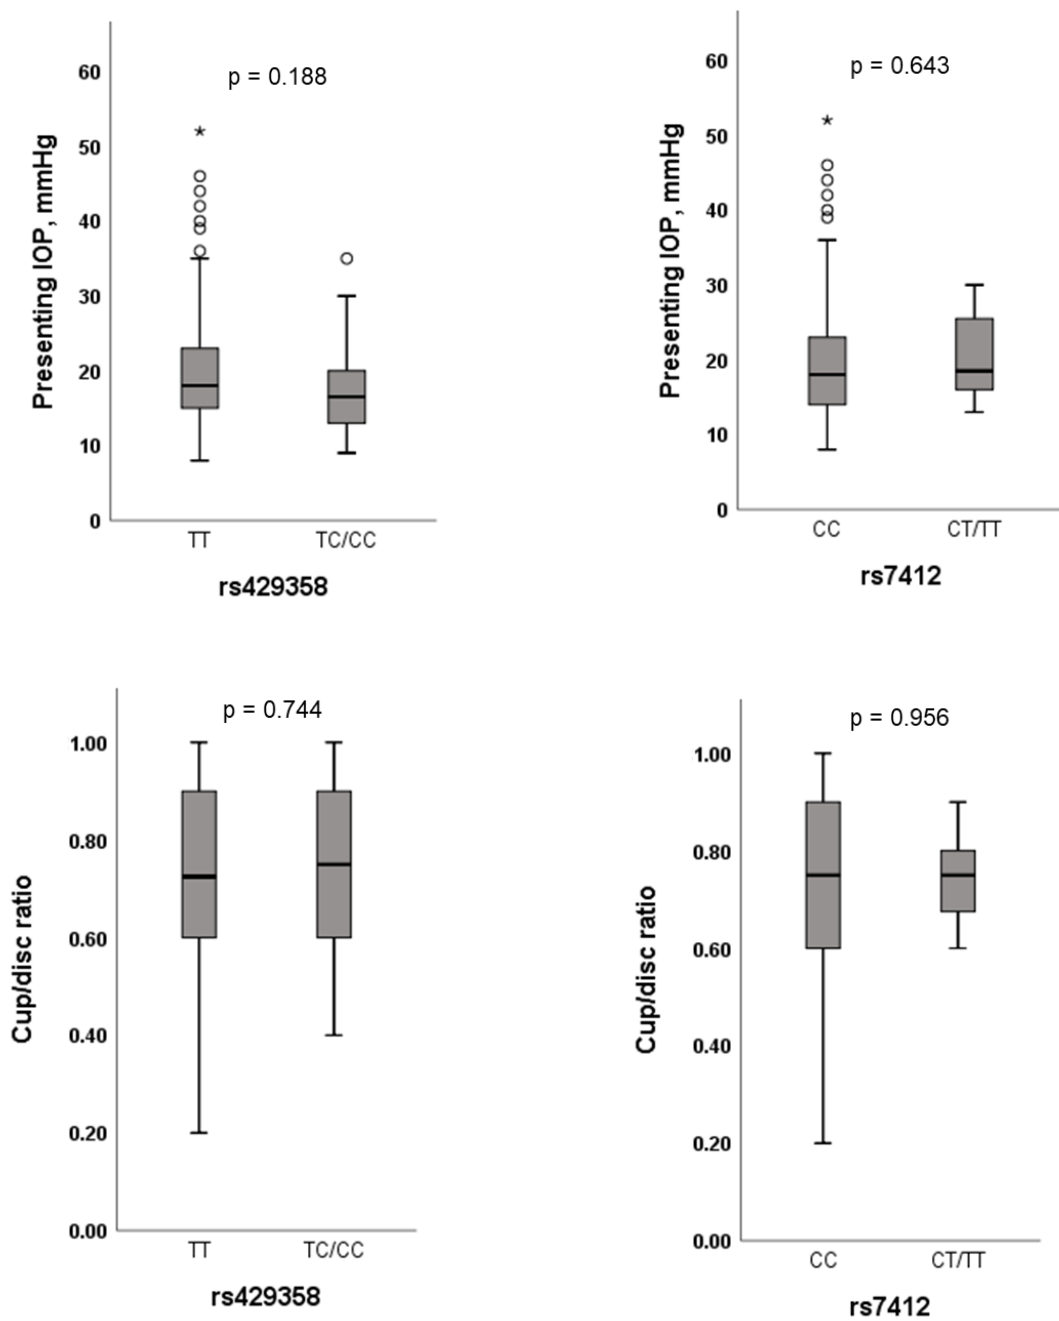

**Figure S2:** Association analysis of IOP and cup/disc ratio with rs429358 and rs7412 genotypes in pseudoexfoliation glaucoma patients in dominant model. \* Outlier.

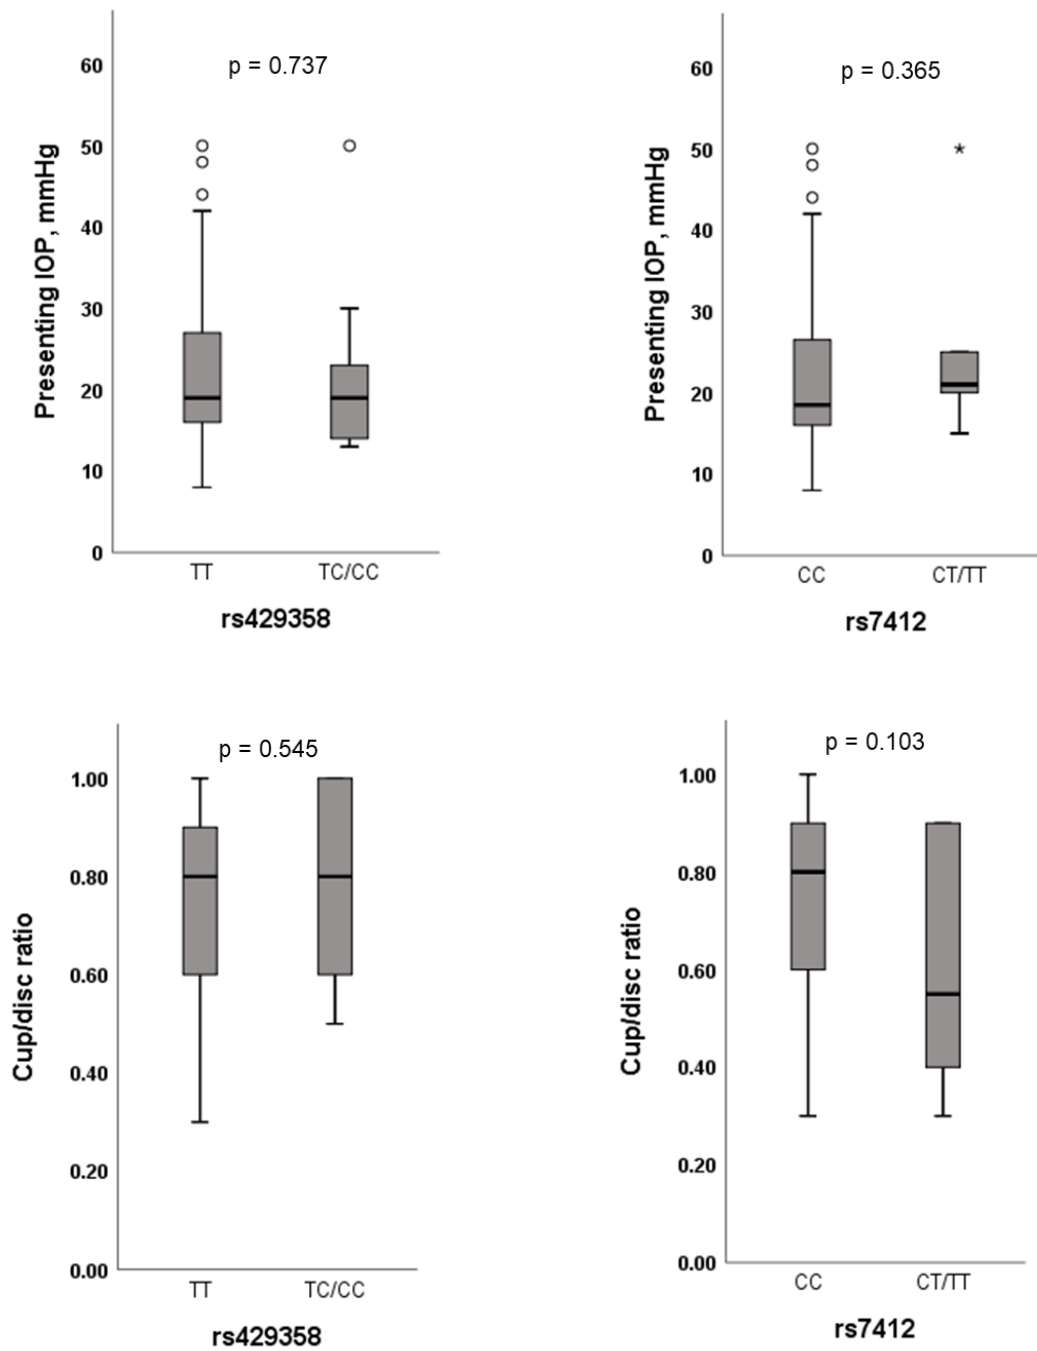

**Table S1:** Genotype analysis of rs429358 and rs7412 polymorphisms in *APOE* gene in primary angle-closure glaucoma (PACG)

| SNP/Model  | Genotype | Control    | PACG      | OR (95% CI)       | <i>p</i>           | AIC   | BIC   |
|------------|----------|------------|-----------|-------------------|--------------------|-------|-------|
| rs429358   |          |            |           |                   |                    |       |       |
| Codominant | T/T      | 204 (81.3) | 74 (80.4) | 1.00              | 0.120              | 400.7 | 412.2 |
|            | T/C      | 46 (18.3)  | 15 (16.3) | 0.90 (0.48-1.72)  |                    |       |       |
|            | C/C      | 1 (0.4)    | 3 (3.3)   | 7.15 (0.72-71.08) |                    |       |       |
| Dominant   | T/T      | 204 (81.3) | 74 (80.4) | 1.00              | 0.860              | 402.9 | 410.5 |
|            | T/C-C/C  | 47 (18.7)  | 18 (19.6) | 1.05 (0.57-1.93)  |                    |       |       |
| Recessive  | T/T-T/C  | 250 (99.6) | 89 (96.7) | 1.00              | 0.044 <sup>s</sup> | 398.8 | 406.5 |
|            | C/C      | 1 (0.4)    | 3 (3.3)   | 7.27 (0.73-72.12) |                    |       |       |
| rs7412     |          |            |           |                   |                    |       |       |
| Codominant | C/C      | 238 (94.8) | 84 (91.3) | 1.00              | 0.480              | 403.4 | 414.9 |
|            | C/T      | 12 (4.8)   | 7 (7.6)   | 1.65 (0.63-4.34)  |                    |       |       |
|            | T/T      | 1 (0.4)    | 1 (1.1)   | 2.83 (0.18-45.81) |                    |       |       |
| Dominant   | C/C      | 238 (94.8) | 84 (91.3) | 1.00              | 0.240              | 401.5 | 409.2 |
|            | C/T-T/T  | 13 (5.2)   | 8 (8.7)   | 1.74 (0.70-4.35)  |                    |       |       |
| Recessive  | C/C-C/T  | 250 (99.6) | 91 (98.9) | 1.00              | 0.490              | 402.4 | 410.1 |
|            | T/T      | 1 (0.4)    | 1 (1.1)   | 2.75 (0.17-44.38) |                    |       |       |

§ age and sex adjusted p-value was non-significant (p = 0.063)

OR – odds ratio, CI – confidence interval, AIC – Akaike information criterion, BIC – Bayesian information criterion

**Table S2:** Genotype analysis of rs429358 and rs7412 polymorphisms in *APOE* gene in pseudoexfoliation glaucoma (PXG)

| SNP/Model  | Genotype | Control    | PXG       | OR (95% CI)       | <i>p</i> <sup>§</sup> | AIC   | BIC   |
|------------|----------|------------|-----------|-------------------|-----------------------|-------|-------|
| rs429358   |          |            |           |                   |                       |       |       |
| Codominant | T/T      | 204 (81.3) | 82 (87.2) | 1.00              | 0.320                 | 407.9 | 419.4 |
|            | T/C      | 46 (18.3)  | 12 (12.8) | 0.65 (0.33-1.29)  |                       |       |       |
|            | C/C      | 1 (0.4)    | 0 (0)     | 0.00 (0.00-NA)    |                       |       |       |
| Dominant   | T/T      | 204 (81.3) | 82 (87.2) | 1.00              | 0.180                 | 406.3 | 414   |
|            | T/C-C/C  | 47 (18.7)  | 12 (12.8) | 0.64 (0.32-1.26)  |                       |       |       |
| Recessive  | T/T-T/C  | 250 (99.6) | 94 (100)  | 1.00              | 0.420                 | 407.5 | 415.2 |
|            | C/C      | 1 (0.4)    | 0 (0)     | 0.00 (0.00-NA)    |                       |       |       |
| rs7412     |          |            |           |                   |                       |       |       |
| Codominant | C/C      | 238 (94.8) | 88 (93.6) | 1.00              | 0.770                 | 409.6 | 421.1 |
|            | C/T      | 12 (4.8)   | 5 (5.3)   | 1.13 (0.39-3.29)  |                       |       |       |
|            | T/T      | 1 (0.4)    | 1 (1.1)   | 2.70 (0.17-43.71) |                       |       |       |
| Dominant   | C/C      | 238 (94.8) | 88 (93.6) | 1.00              | 0.670                 | 407.9 | 415.6 |
|            | C/T-T/T  | 13 (5.2)   | 6 (6.4)   | 1.25 (0.46-3.39)  |                       |       |       |
| Recessive  | C/C-C/T  | 250 (99.6) | 93 (98.9) | 1.00              | 0.490                 | 407.7 | 415.3 |
|            | T/T      | 1 (0.4)    | 1 (1.1)   | 2.69 (0.17-43.42) |                       |       |       |

§ age and sex adjusted p-value was non-significant

OR – odds ratio, CI – confidence interval, AIC – Akaike information criterion, BIC – Bayesian information criterion

**Table S3:** Binary logistic regression analysis in primary angle-closure glaucoma (PACG) and pseudoexfoliation glaucoma (PXG)

| <b>Group Variables</b> | <b>B<sup>a</sup></b> | <b>SE</b> | <b>Wald</b> | <b>OR (95% CI)</b> | <b>p</b> |
|------------------------|----------------------|-----------|-------------|--------------------|----------|
| <b>PACG</b>            |                      |           |             |                    |          |
| Age                    | 0.016                | 0.017     | 0.969       | 1.02 (0.98-1.05)   | 0.325    |
| Sex                    | -0.282               | 0.248     | 1.290       | 0.75 (0.46-.22)    | 0.256    |
| rs429358               |                      |           | 3.219       | -                  | 0.200    |
| T/C                    | -0.152               | 0.334     | 0.207       | 0.86 (0.44-.65)    | 0.859    |
| C/C                    | 2.009                | 1.172     | 2.938       | 7.45 (0.75-74.16)  | 0.086    |
| T/C+C/C                | 0.006                | 0.314     | 0.000       | 1.00 (0.55-1.86)   | 0.985    |
| rs7412                 |                      |           | 1.758       | -                  | 0.415    |
| C/T                    | 0.587                | 0.503     | 1.365       | 1.80 (0.67-4.82)   | 0.243    |
| C/C                    | 0.925                | 1.429     | 0.419       | 2.52 (0.15-41.52)  | 0.517    |
| C/T+C/C                | 0.555                | 0.474     | 1.370       | 1.74 (0.69-4.41)   | 0.242    |
| <b>PXG</b>             |                      |           |             |                    |          |
| Age                    | 0.168                | 0.021     | 64.086      | 1.18 (1.13-1.23)   | 0.000    |
| Sex                    | 0.195                | 0.293     | 0.441       | 1.21 (0.68-2.15)   | 0.507    |
| rs429358               |                      |           | 1.489       |                    | 0.475    |
| T/C                    | -0.520               | 0.426     | 1.489       | 0.59 (0.26-1.37)   | 0.222    |
| C/C                    | -22.391              | 40192.970 | 0.000       | 0.00               | 1.000    |
| T/C+C/C                | -0.632               | 0.421     | 2.252       | 0.53 (0.23-1.21)   | 1.33     |
| rs7412                 |                      |           | 0.243       |                    | 0.886    |
| C/T                    | -0.338               | 0.690     | 0.240       | 0.71 (0.18-2.76)   | 0.624    |
| C/C                    | 0.073                | 1.430     | 0.003       | 1.08 (0.07-17.74)  | 0.959    |
| C/T+C/C                | -0.211               | 0.620     | 0.115       | 0.81 (0.24-2.73)   | 0.734    |

OR – odds ratio, CI – confidence interval. <sup>a</sup> B is the estimated coefficient, with standard error, SE
